# Supplementary material for: Insula to mPFC reciprocal connectivity differentially underlies novel taste neophobic response and learning in mice
Source: eLife. 2021 Jul 5;10:e66686. doi: 10.7554/eLife.66686 (PMC8282338; doi:10.7554/eLife.66686)
Supplement: Figure 1—figure supplement 1—source data 1. [file elife-66686-fig1-figsupp1-data1.xls]

## Sheet: 1a
Source data for Figure 1-figure Supplement 1a
					Novel Saccharin						Familiar saccharin
				Total IC	154.591	130	176.636				161.458	161.043	108.048	256.455
				AIC	112.909	61.5417	113.636				102.5	126.174	74.4286	159.864
				DIC	33.6818	50.3333	49.6818				45	29.913	25.8095	77.3636
				GIC	8	18.125	13.3182				13.9583	4.95652	7.80952	19.2273

## Sheet: 1b
Figure Supplementary 1b
					Novel Saccharin						Familiar saccharin
				Layers 1-3	62.0909	53.5	75.7273				54.5833	78.8696	39.9524	146.273
				Layers 4-6	100.909	76.5	92.5				111.454	68.0952	82.1739	106.875
						Source data for Figure 1-figure Supplement 1b

## Sheet: 1c
Source data for Figure 1-figure Supplement 1c
					Novel saccharin						Familiar saccharin
				Total mPFC	333.143	550.75	384.143				421.571	557.143	255.4
				PrL	185.429	323.625	216.75				184.571	294.286	140
				InfrL	40.1429	64.875	61.5				71.8333	55
				Cg1	107.571	162.25	87.375				175.429	207.857	115.4

## Sheet: 1d
Source data for Figure 1-figure Supplement 1d
				Novel Saccharin						Familiar saccharin
			Layers 1-3	184	202.125	134.125				167.571	216.429	75.4
			Layers 4-6	149.143	348.625	231.5				254	340.714	180
