# Supplementary material for: Insula to mPFC reciprocal connectivity differentially underlies novel taste neophobic response and learning in mice
Source: eLife. 2021 Jul 5;10:e66686. doi: 10.7554/eLife.66686 (PMC8282338; doi:10.7554/eLife.66686)
Supplement: Figure 1—source data 1. [file elife-66686-fig1-data1.xlsx]

## Sheet: b.Total IC
Figure 1b
Novel Saccharin					Familiar saccharin
Mouse A	Mouse B	Mouse C			Mouse A	Mouse B	Mouse C	Mouse D	Mouse E
	187							116	128
247		171			176	134
							162
	119							92	130
		152			240	147
							166
	146							145	110
208		141			165	107
							147
	113							107	99
259		155			205	110
							150
	114							101	107
295		159			140	134
							160
	151							110
266		151			180	128
							158
	164							158	75
167		175			156	89
							144
	138							145	130
259					153	109
							81
	148							151	122
218		135			163	83
							103
	123								101
143		159			109	124
							93
	169							152	82
164		116			151	100
	138							149	84
177		147			143	105
							61
	106							106	86
165		150			156	83
							79
	125								71
180		112			132	86
							78
	144							154	75
159		78			178	92
							87
	125							107	67
161		99			147	80
							77
	110							102	88
144		106			129	84
							97
	115							107	74
133		94			134	98
	118							104
99		90			85	67
							89
	107							105	84
95		87			116
							120
	113							116	85
104		61			106	65
							90
	75							117	79
		76			129	50
							80
	83							115	77
117		66			111	97
	90								77
111					97	69

## Sheet: c.AIC
Figure 1c
Novel Saccharin					Familiar saccharin
Mouse A	Mouse B	Mouse C			Mouse A	Mouse B	Mouse C	Mouse D	Mouse E
								86
159	111	124			120	93	95		84
								51
	82	121			162	107	100		83
								73
140	105	116			115	84	85		70
								72
194	80	112			127	78	96		68
								55
182	85	124			97	91	110		59
								63
186	108	110			107	100	102
								88
108	69	123			108	59	85		56
								83
174	62				93	72	55		79
								73
135	80	78			105	56	66		81
90	60	116			56	86	61		67
								87
94	82	80			92	55			42
								81
116	61	98			79	70	33		50
								54
92	44	97			67	56	42		50
106	60	77			56	58	39		38
								73
80	66	33			74	46	25		36
								46
81	48	56			60	42	33		31
								42
78	30	36			42	35	21		47
								60
48	39	30			49	39			34
								47
27	30	22			30	23	16
								33
31	24	21			35		27		29
								47
25	29	15			26	30	14		36
								41
	21	21			36	19	21		25
								36
32	18	19			33	37			38
30	19				35	24			29

## Sheet: d.DIC
Figure 1d
Novel Saccharin					Familiar saccharin
Mouse A	Mouse B	Mouse C			Mouse A	Mouse B	Mouse C	Mouse D	Mouse E
	31							21	32
37					31	23
	20							20	32
		33			53	23	31
	25							34	20
38		20			27	13	42
	15							20	24
44		13			56	21	29
	11							23	31
59		28			25	28	27
	26							22
46		20			43	12	28
	73							41	12
33		25			36	20	35
	53							44	34
48		29			44	22	37
	50							52	34
57					37	18	17
	39								24
35		32			32	21	27
	65							40	32
48		24			39	27	25
	60							49	14
46		20			42	19
	46							45	26
55		38			59	20	15
	52								23
51		38			53	18	20
	61							62	27
54		23			77	33	32
	51							49	26
61		33			70	26	47
	60							47	34
44		36			74	41	28
	54							34	32
72		59			62	50	57
	58							35
48		51			42	37
	57							40	46
51		53			60	0	56
	53							41	31
62		55			63	27	75
	43							48	40
		34			68	21	60
	46							48	33
61		44			58	43	40
	60								38
50		37			49	29

## Sheet: e. GIC
Figure 1e
Novel Saccharin					Familiar saccharin
Mouse A	Mouse B	Mouse C			Mouse A	Mouse B	Mouse C	Mouse D	Mouse E
								9	12
51	45				25	18	36
		14
								21	15
	17				25	17	24
		11
								38	20
30	16				23	10	33
		12
								15	7
21	18				22	11	27
		15
								23	17
54	18				18	15	22
		15
								25
34	17				30	16	21
		16
								29	7
26	22				12	10	22
		23
								18	17
37	23				16	15	9
								26	7
26	18				21	9	10
		25
									10
18	24				21	17	7
		19
								25	8
22	22				20	18
		16
								19	20
15	17				22	16	13
		11
								7	10
18	16				30	7	17
		15
									10
23	13				23	10	7
		12
								19	12
25	17				27	13	15
		12
								12	10
19	26				17	12	16
		7
								13	7
22	20				13	8	19
		11
								13	8
13	22				23	9
		13
								22
24	30				13	7	17
		15
								32	9
13	26				21		18
		11
								28	18
17	31				17	8	16
		12
								28	14
	11				25	10	19
		11
								31	6
24	19				20	17
		10
									10
31	11				13	16

## Sheet: f.Layer 1-3
Figure 1f
Novel Saccharin					Familiar saccharin
Mouse A	Mouse B	Mouse C			Mouse A	Mouse B	Mouse C	Mouse D	Mouse E
								80	78
129	106				103	85
								53	76
	61	81			137	78	78
								88	57
104	80	71			92	75	81
								70	52
135	55	68			109	72	71
								70	53
149	71	67			88	76	74
								64
129	94	89			90	75	85
								92	41
89	110	56			90	51	86
								74	62
133	84	74			84	62	69
								86	56
110	94				98	40	39
									50
73	76	67			66	63	50
								90	37
99	99	78			84	57	39
								67	44
103	88	51			94	59
								62	38
101	70	73			90	49	24
									42
113	72	71			80	52	42
								69	40
98	95	56			105	50	40
								57	40
84	72	34			75	48	39
								53	50
72	69	47			71	42	39
								61	42
90	66	60			76	60	54
								54
57	63	45			45	35
								47	47
63	58	47			55		49
								56	38
66	62	40			50	38	64
								58	43
	45	35			58	19	44
								65	47
65	52	41			59	40	46
									44
52	46	30			58	27

## Sheet: g.Layer 4-6
Figure 1g
Novel Saccharin					Familiar saccharin
Mouse A	Mouse B	Mouse C			Mouse A	Mouse B	Mouse C	Mouse D	Mouse E
								36
118	81				73	49			50
		90						39
	58				103	69	84		54
		81						57
104	66				73	32	85		53
		73						37
124	58				96	38	76		47
		88						31
146	43				52	58	76		53
		70						46
137	57				90	53	75
		95						66
78	54				66	38	72		34
		101						71
126	54				69	47	75		68
								65
108	54				65	43	42		66
		68
70	47				43	61	53		51
		81						62
65	70				67	43	54		45
		65						82
74	50				49	46			40
		74						44
64	36				66	34	37		48
		79
67	53				52	34	37		29
		56						85
61	49				73	42	38		35
		44						50
77	53				72	32	48		27
		52						49
72	41				58	42	38		38
		46						46
43	49				58	38	43		32
		49						50
42	55				40	32
		43						58
32	49				61		40		37
		47						60
38	51				56	27	56		47
		26						59
	30				71	31	46		36
		35						50
52	31				52	57	34		30
		36
59	44				39	42			33

## Sheet: j. total IC- mPFC projections %
Figure 1j
Novel Saccharin					Familiar saccharin
Mouse A	Mouse B	Mouse C			Mouse A	Mouse B	Mouse C	Mouse E
					7.69231		3.77359	3.71429
10.7407	18.9349	12.9032				6.08365
					10.8		2.31214	6.44172
	12.2302	10.2767				9.35484
					4.41767		3.38983	3.06749
6.09756	10.4294	12.4424				5.02513
					8		6.32911	5.4902
13.3758	7.46269	12.3077				6.41711
					6.37255		5.51724	5.03597
5.35714	7.58621	10.6383				5.88235
					6.56566		5.42636
16.1616	9.42029	8.3682				6.54206
					10.5		2.5	5.16432
11.1765	6.06061	11.4173				2.65957
					6.95187		8.69565	5.40541
15.3846	4.79452					5.36585
					8.29016		6.81818	6.46388
8.60927	100	4.62963				4.08163
					2.35294			8.04598
3.82166	7.19424	8.93855				8.83978
					7.7381		2.04082	3.0303
8.4507	11.1111	10.3448				1.72414
					5.40541		4.58716	3.00429
9.44882	9.93378	11.4942				7.00637
					7.34463		4.70588	4.47154
9.48905	10.4167	10.119				6.45161
					4.54545			3.4188
8.39695	10.5769	9.65517				3.67647
					7.94702		8	1.68067
3.40136	8.78378	3.40136				4.05405
					6.71141		7.31707	3.34728
6.66667	5.92593	5.6962				4.37956
					5.97015		1.88679	4.34783
7.89474	9.52381	5.84416				3.9604
					4.6875		9.67742	3.6
2.7027	13.4454	5.92593				7.35294
					6.12245		21.0526
2.29885	8.4507	3.93701				5.26316
					3.40909		15.493	7.62712
5.06329	7.8125	6.36364
					1.08696		21.25	5.38117
6.89655	10	5.30973				6.52174
					5.66038		12.8205	3.92157
	6.06061	6.48148				4.34783
					4.54545		21.1268	4.0724
3.84615	3.50877	3.9604				10.1124
					7.5			3.88349
5.35714	2.77778					6.49351

## Sheet: K.AIC projections
Figure 1K
Novel Saccharin					Familiar saccharin
Mouse A	Mouse B	Mouse C			Mouse A	Mouse B	Mouse C	Mouse E
					9.5		3.90625	2.66667
14.3617	21.4815					6.57895
					12.0603		2.3622	6.97674
	16.8421	15.0538				9.3985
					3.94089		3.81679	3.84615
8.9172	11.4504	11.4832				4.90798
					9.03614		7.46269	5.40541
14.0794	8.33333	14.881				7.10059
					6.50888		5.78512	7.05882
5.02513	8.27068	14.7541				6.16114
					5.34351		5.76923
19.3416	9.91736	12.234				6.89655
					11.1801		2.32558	5.88235
12.2302	4.47761	10.559				2.97619
					8.06452		11.25	6.01852
18.8312	3.0303	15.9236				6.0241
					8.86076		7.14286	5.55556
8.95522	100					4.09836
					1.53846			9.82659
3.93701	3.33333	5.10949				8.69565
					9.01639		2.8169	3.16456
9.09091	16.6667	11.9048				1.41844
					6.97674		4.7619	4.44444
10.7843	13.3333	12.766				7.80142
					7.92079		5.26316	4.67836
9.67742	15.2174	12.9032				7.75862
					2.5974			3.92157
13.0952	16.6667	11.9266				3.09278
					8.86076		6.25	1.33333
4.7619	11.1111	11.3402				4.6729
					6.32911		9.25926	3.79747
6.66667	12.8205	5.33333				5.06329
					3.1746		3.125	5.64972
9.61538	2.5641	10.3896				5.17241
					1.92308		9.7561	3.24675
2.17391	10.3448	5.05051				5.61798
					0		20
2.38095	3.125	10.1449				3.27869
					3.125		4.7619	10.7143
8.33333	0	5.35714
					0		17.6471	7.31707
7.40741	9.375	2.22222				7.14286
					6.25		9.67742	4.16667
	10.3448	4.34783				4.16667
					7.40741		20.6897	5.88235
5.88235	5.26316	2.08333				10.8108
					4.34783			5.43478
4.7619	0	2.17391				3.44828

## Sheet: L. DIC projections
Figure 1L
Novel Saccharin					Familiar saccharin
Mouse A	Mouse B	Mouse C			Mouse A	Mouse B	Mouse C	Mouse E
						2.85714	4.34783
2.89855	10.3448				1.72414			5.15464
						10.5263	0
	2.38095	7.69231			6.81818			6.0241
						5.55556	2.5
1.26582	7.40741	3.0303			6.06061			2.1978
						0	0
9.375	4.54545	4.54545			6.81818			7.01754
						0	4.54545
0	0	8.06452			3.84615			2.43902
						0	4.34783
2.32558	0	5			8.33333
						0	3.84615
11.1111	8.77193	4.54545			8.57143			2.85714
						2.94118	3.44828
2.85714	7.69231	4.5977			5.35714			5.61798
						4.54545	6.89655
6.25	100				6.25			11.3208
						11.1111
4	12.1212	3.27869			5.40541			5.7971
						3.22581	0
7.31707	7.69231	2.32558			5.12821			3.125
						0	4.54545
5.26316	8.10811	7.89474			3.84615			1.23457
						2.77778	3.84615
11.4286	7.31707	9.30233			6.25			4.83871
						5.71429
0	3.63636	7.84314			6.97674			3.1746
						2.85714	14.2857
0	9.63855	8.33333			9.09091			2.53165
						3.7037	4.16667
9.67742	4.34783	2			10.2041			2.8169
						2.94118	0
2.5	13.8461	1.92308			9.43396			2.22222
						8.33333	10.5263
4.16667	16.3636	9.30233			7.27273			4.65116
						10.7143	16.6667
0	14.0625	1.81818			4.34783
							18.1818
2.94118	15.625	3.92157			2.85714			5.94059
						6.97674	22.5806
8.69565	11.7647	11.5385			2.22222			5.10204
						5.55556	18.1818
	6.15385	7.14286			7.84314			5.06329
						11.1111	15.7895
4	4.08163	13.5135			2.85714			2.29885
						9.67742
5	4.16667	4.87805			12.1212			3.52941

## Sheet: m. Layer 1-3 projections
Figure 1m
Novel Saccharin					Familiar saccharin
Mouse A	Mouse B	Mouse C			Mouse A	Mouse B	Mouse C	Mouse E
	26.9231				7.14286	8.72483	1.51515	5.18135
16.4062		12.9771
	13.5593				9.25926	10.1351	1.42857	6.12245
		6.15385
	10				4	5.76923	5.26316	2.85714
6.18557		12.6126
	5.55556				10	10.8434	8.64198	4.41176
11.4865		12.5
	10.4478				7.79221	4.58716	5.47945	5.22876
1.96078		9.01639
	15.873				7.35294	6.89655	1.78571
22.0339		6.09756
	10.5263				5.55556	2.9703	1.78571	5.51181
11.1111		7.20721
	5.26316				5.45455	7.33945	2.5	4.11765
13.0952
	100				7.8125	2.5641	7.69231	4.96454
8.4507		2.32558
	5.35714				0	7.79221		8.3871
3.0303		3.65854
	12.9032				5.45455	2.35294	0	0
6.66667		9.43396
	9.72222				2.43902	8.33333	8.57143	2.27273
8.95522		2.94118
	20.5882				6.25	7.31707	7.40741	4.28571
10.9091		4.10959
	11.3636				0	6.77966		2.94118
6.81818		8.62069
	10				8.88889	1.38889	10.5263	2.15827
1.75439		2.32558
	2.04082				2.32558	0	0	2.83688
0		3.22581
	10				2.43902	2.08333	0	5.1948
6.25		1.36986
	18.75				2.22222	4.83871	10.5263	3.78788
4.54545		0
	4.91803				3.0303	4.87805	21.0526
0		0
	6.97674				4.16667		4.16667	5.92593
10		0
	14				0	8.82353	10	4.92958
11.1111		2
	7.27273				6.66667	2.12766	4.16667	3.00752
		0
	0				0	4.7619	9.09091	4.58015
13.3333		0
	1.63934				3.57143	3.33333		3.33333
0

[truncated: 1 more sheets: n. layer 4-6 Projections]
