# Supplementary material for: Insula to mPFC reciprocal connectivity differentially underlies novel taste neophobic response and learning in mice
Source: eLife. 2021 Jul 5;10:e66686. doi: 10.7554/eLife.66686 (PMC8282338; doi:10.7554/eLife.66686)
Supplement: Figure 2—figure supplement 1—source data 1. [file elife-66686-fig2-figsupp1-data1.xls]

## Sheet: 1a
Source data for Figure 2-figure Supplement 1a
Firing frequency
		Familiar Saccharin
	0	0	0	0	0	0	0	0	0	0	0
	50	0	0	0	0	0	0	0	0	0	0
	100	0	0	4.51914	0	9.59628	10.7147	8.6381	9.02855	4	11.3488
	150	0	0	11.7967	10.4827	15.6985	17.1007	14.9575	14.3541	12.4619	18.5083
	200	0	0	16.0972	16.6858	20.6128	23.3844	20.083	18.1101	17.4268	23.8173
	250	0	0	20.2229	21.9588	25.4216	28.9507	23.9602	21.4705	20.9458	28.6378
	300	2	5.16483	23.2904	25.6783	28.3027	34.5736	28.7352	23.317	23.8286	33.5062
	350	8.40428	11.3844	25.963	29.2705	30.2208	37.503	31.5738	25.247	26.2937	37.4366
	400	12.3949	17.5762	28.915	32.7645	33.1177	41.4508	35.0637	26.9805	28.46	40.4121
	Novel Saccharin
	0	0	0	0	0	0	0	0	0	0
	0	0	0	0	0	0	0	4.06736	0	0
	0	0	0	0	0	0	0	15.3006	0	0
	0	10.4287	0	11.3088	12.1403	5.22902	8.29732	22.1778	7.90767	5.43981
	2	20.5461	0	16.2496	23.1536	13.0882	14.2113	28.6608	14.7863	11.9612
	7.56203	26.9914	10.7678	21.2703	18.296	19.6541	18.4392	33.0237	20.0519	17.0501
	13.5924	31.983	19.1606	24.6128	28.5489	23.596	22.1289	37.1015	25.8808	20.68
	17.8924	37.5832	27.5821	26.287	33.0425	27.6219	24.9173	39.7172	29.6465	24.548
	22.8817	43.4123	36.115	28.4192	36.3794	30.7682	27.4515	42.7108	33.5793	26.8231

## Sheet: 1b
Source data for Figure 2-figure Supplement 1b
RMP
		Familiar 2/3 (saccharin, IC-mPFC)		Novel 2/3(saccharin, IC-mPFC)
		-87.8025		-75.1406
		-77.2083		-76.055
		-69.322		-80.1668
		-73.8582		-73.2192
		-64.3362		-63.9862
		-69.2068		-69.4206
		-70.6104		-72.3743
		-69.2757
		-70.2605		-65.5747
		-70.763		-73.1143
				-73.4455

## Sheet: 1c
Source data for Figure 2-figure Supplement 1c
mAHP
			Familiar Saccharin		Novel Saccharin
			-0.35		1.03
			0.18		-2.04
			-5.36		0.54
			-3.6		-7.07
			-5.1		-6.08
			-8.8		-4.57
			-4.17		-3.76
			-3.76		-5.35
			-4.66		-4.25
			-6.61		-3.54

## Sheet: 1d
Source data for Figure 2-figure Supplement 1d
Firing Threshold
		Familiar 2/3 (saccharin, IC-mPFC)		Novel 2/3(saccharin, IC-mPFC)
		-31.19		-32.7
		-40.14		-38.05
		-21.14		-39.83
		-30.14		-31.71
		-33.84		-32.72
		-31		-28.75
		-37.07		-30.33
		-25.69		-34.42
		-27.61		-33.5
		-24.17		-37.22

## Sheet: 1e
Source data for Figure 2-figure Supplement 1e
IR
		Familiar 2/3 (saccharin, IC-mPFC)		Novel 2/3(saccharin, IC-mPFC)
		49.6667		89.8667
		48.9333		119.267
		127.8		88.0667
		130.8		135.333
		166.267		136.733
		169.867		132
		146.467		170.867
		126.667		177
		128.267		137.067
		193.933		100

## Sheet: 1f
Source data for Figure 2-figure Supplement 1f
Sag ratio
		Familiar 2/3 (saccharin, IC-mPFC)		Novel 2/3(saccharin, IC-mPFC)
		0.134048		-0.822737
		0.407056		3.14023
		11.9835		0.974513
		0		10.5727
		12.5832		5.17799
		11.4663		4.25532
		9.40206		8.20201
		10.4618		7.8125
		8.38095		4.77073
		4.77905		12.2294

## Sheet: 1g
Source data for Figure 2-figure Supplement 1g
membrane time constant
			Familiar 2/3 (saccharin, IC-mPFC)		Novel 2/3(saccharin, IC-mPFC)
			7.02538		12.6083
			10.6459		9.10171
			28.0852		7.75318
			10.744		31.1432
			33.4331		25.3622
			27.3544		13.6038
			26.4107		26.6404
			26.4096		27.4701
			22.5469		21.5399
			26.2702		21.1088

## Sheet: 1h
Source data for Figure 2-figure Supplement 1h
AP halfwidth
			Familiar 2/3 (saccharin, IC-mPFC)		Novel 2/3(saccharin, IC-mPFC)
			0.69		0.52
			0.59		0.8
			0.75		0.55
			0.78		0.76
			0.73		0.7
			0.47		0.89
			0.76		0.89
			0.73		0.57
			0.62		0.73
			0.91		0.55

## Sheet: 1i
Source data for Figure 2-figure Supplement 1i
AP amplitude
		Familiar 2/3 (saccharin, IC-mPFC)		Novel 2/3(saccharin, IC-mPFC)
		63.6		57.19
		56.46		63.2
		68.76		60.12
		45.62		61.07
		42.84		57.53
		50.9		49.16
		44.13		45.2
		60.58		46.48
		56		47.7
		37.2		62.96

## Sheet: 1j
Source data for Figure 2-figure Supplement 1j
Rheobase
			Familiar 2/3 (saccharin, IC-mPFC)		Novel 2/3(saccharin, IC-mPFC)
			310		224
			290		120
			83		180
			126		92
			50		95
			45		135
			48		88
			75		40
			85		105
			70		120
