# Supplementary material for: Insula to mPFC reciprocal connectivity differentially underlies novel taste neophobic response and learning in mice
Source: eLife. 2021 Jul 5;10:e66686. doi: 10.7554/eLife.66686 (PMC8282338; doi:10.7554/eLife.66686)
Supplement: Figure 2—figure supplement 2—source data 1. [file elife-66686-fig2-figsupp2-data1.xls]

## Sheet: 2a
Source data for Figure 2- Figure Supplement 2a
mAHP
				Familiar 5/6(saccharin, IC-mPFC)		Novel 5/6(saccharin, IC-mPFC)		Cage control, IC-mPFC
				-3		-0.68			-2.49
				-1.41		-2.16			-1.78
				-4.03		-2.47			-8.37
				-2.86		-4.49			-0.13
				-10.52		-4.16			2.01
				-5.58		-6.38			1.75
				-4.5		-6.3			-6.41
				-5.94		-6.07			-8.68
				-4.03		-3.99			-5.22
				-3.61		-1.42			-2.67
				-5.1		-2.98			-4.65
				-0.14		-11.15			-3.73
				-3.1		-12.04			-3.3
						-7.99

## Sheet: 2b
Source data for Figure 2- Figure Supplement 2b
Firing threshold
			Familiar 5/6(saccharin, IC-mPFC)		Novel 5/6(saccharin, IC-mPFC)			Cage control
			-30.21		-32.44			-28.14
			-38.32		-21.59			-17.75
			-40.53		-32.63			-35.37
			-33.86		-34.87			-40.46
			-45.25		-42.21			-27.17
			-42.53		-33.16			-35.47
			-39.11		-42.37			-32.76
			-25.9		-43.55			-28.15
			-22		-30.72			-42.47
			-37.82		-37.37			-29.87
			-26.81		-36.55			-36.65
			-15.42		-32.4			-38.91
			-32.28		-34.32			-38.02
					-35.78

## Sheet: 2c
Source data for Figure 2- Figure Supplement 2c
RMP
	Cage control 5/6 (IC-mPFC)		Novel 5/6(saccharin, IC-mPFC)		Familiar 5/6(saccharin, IC-mPFC)
	-75.6936		-72.3263		-60.6995
	-65.5159		-62.2085		-56.3502
	-68.1392		-60.4925		-60.7213
	-71.4155		-67.0967		-54.1515
	-67.7027		-62.4837		-59.1469
	-66.5851		-63.0649		-59.472
	-62.2555		-67.2038		-65.0485
	-61.6784		-63.2925		-67.2729
	-68.7426		-67.6913		-56.5809
	-76.0005		-68.9379		-66.5835
	-67.6075		-76.3075		-68.9802
	-68.7058		-72.2677		-67.4544
	-68.7155		-68.0827		-65.899
			-69.4508

## Sheet: 2d
Source data for Figure 2- Figure Supplement 2d
Time constant
			Familiar 5/6(saccharin, IC-mPFC)		Novel 5/6(saccharin, IC-mPFC)		Cage control
			26.6145		13.0062		16.5421
			8.1435		31.7363		24.9499
			9.16413		9.41973		17.906
			11.5912		20.6689		24.5991
			11.0387		13.0454		24.6935
			8.68925		17.4876		8.54322
			9.2018		11.6579		29.396
			12.6668		10.5349		36.7265
			24.2555		23.9692		13.8952
			11.5343		12.0439		15.1816
			18.9475		16.4771		11.3529
			9.98301		23.387		9.19275
			23.6862		33.5503		10.5808
					20.6345

## Sheet: 2e
Source data for Figure 2- Figure Supplement 2e
AP amplitude
			Familiar 5/6(saccharin, IC-mPFC)		Novel 5/6(saccharin, IC-mPFC)			Cage control
			57.62		36.65			41.72
			59.57		58.65			47.85
			48.25		43.98			64.45
			55.15		53.24			55.91
			55.02		53.28			62.26
			58.72		57.07			53.38
			60.55		61.34			49.1
			62.87		52.64			57.28
			49.8		60.1			58.29
			49.8		56.18			40.95
			65.28		44.79			64.42
			69.4		50.17			59.6
			41.23		44.13			44.49
					35.13

## Sheet: 2f
Source data for Figure 2- Figure Supplement 2f
AP halfwidth
			Familiar 5/6(saccharin, IC-mPFC)		Novel 5/6(saccharin, IC-mPFC)		Cage control
			0.89		0.9		1.12
			0.51		0.59		1.02
			0.63		0.47		1.02
			0.58		0.46		0.98
			0.53		0.5		1.02
			0.58		0.86		0.82
			0.59		0.47		0.84
			0.64		0.49		0.66
			0.85		0.62		0.57
			0.46		0.57		0.8
			0.64		0.55		0.64
			1.04		0.77		0.56
			1.07		0.68		0.75
					0.66

## Sheet: 2g
Source data for Figure 2- Figure Supplement 2g
Rheobase
					Cage control 5/6 (IC-mPFC)		Novel 5/6(saccharin, IC-mPFC)		Familiar 5/6(saccharin, IC-mPFC)
					98		80		75
					78		45		110
					58		54		100
					55		120		48
					48		32		20
					128		35		120
					55		65		130
					30		90		90
					52		123		90
					170		95		180
					84		95		110
					110		22		200
					95		50		62
							58

## Sheet: 2h
Source data for Figure 2- Figure Supplement 2h
Input resistance
				Cage control 5/6 (IC-mPFC)		Novel 5/6(saccharin, IC-mPFC)		Familiar 5/6(saccharin, IC-mPFC)
				164.267		163.267		147.933
				148.8		204.867		64.6
				85.1333		104.533		94.0667
				170.267		125.133		72.6
				194.933		221.733		87.6667
				112.4		204		73.3333
				132.333		97.4667		67.8
				163.467		86.2		89.3333
				94.1333		89.5333		156.2
				123.533		107		89.6667
				88.8		143.267		131.133
				71.4		176.2		116.733
				121.4		175.133		198.8
						203.467

## Sheet: 2j
Source data for Figure 2- Figure Supplement 2j
sag ratio
		Cage control 5/6 (IC-mPFC)		Novel 5/6(saccharin, IC-mPFC)		Familiar 5/6(saccharin, IC-mPFC)
		5.48523		1.44869		5.49404
		7.61589		-1.01907		17.0377
		34.4456		-1.95059		14.0682
		4.0571		8.57282		12.9496
		12.0337		9.42266		19.0769
		2.09059		3.59168		18.7592
		14.0693		20.5435		22.3664
		16.1996		20.1359		22.4537
		23.5931		16.324		4.28922
		2.42233		3.89222		2.67728
		18.8794		3.80483		7.34809
		26.0359		5.23485		4.47354
		16.4679		20.8735		8.77944
				6.00554
