# Supplementary material for: Insula to mPFC reciprocal connectivity differentially underlies novel taste neophobic response and learning in mice
Source: eLife. 2021 Jul 5;10:e66686. doi: 10.7554/eLife.66686 (PMC8282338; doi:10.7554/eLife.66686)
Supplement: Figure 2—source data 1. [file elife-66686-fig2-data1.xlsx]

## Sheet: 2c
Figure 2							Familiar 5/6(saccharin, IC-mPFC)
Firing frequency						0	0	0	0	0	0	0	0	0	0	0	0	0	0
						50	0	0	0	0	14.8677	0	0	0	0	0	0	0	0
						100	0	0	4	7.04093	18.4188	0	0	0	11.309	0	5.48244	0	7.27696
						150	9.47771	5.12164	18.8343	14.4474	24.8685	0	4	5.14139	16.3836	0	14.6699	2	15.6831
						200	18.9781	14.9445	33.2556	22.1641	32.9775	4	10.8547	12.7206	20.1017	4.68907	20.4966	11.6802	20.339
						250	23.3329	24.3115	16.1977	29.5924	37.5471	11.3762	11.5929	18.3024	22.781	15.8329	25.56	17.6701	23.3267
						300	27.0082	32.2294	2	33.8871	42.5701	22.7471	19.6637	24.6339	24.716	24.2591	29.457	22.9304	26.895
						350	29.9065	37.5783	2	37.5141	44.9259	25.717	23.6091	28.5054	26.0158	30.9804	32.4884	26.8997	29.0947
						400	32.9801	42.1677	2	42.0997	48.6628	31.08	26.7386	32.7711	26.8734	37.8251	35.1298	29.6355	31.4888
							Novel 5/6(saccharin, IC-mPFC)
						0	0	0	0	0	0	0	0	0	0	0	0	0	0	0
						50	0	0	0	4	16.5344	9.05715	0	4.3756	0	0	0	8.16193	0	0
						100	6.03141	6.40449	19.6284	12.9527	31.754	19.4099	4.02026	18.3343	0	8.69364	5.48244	14.3082	7.94908	8.50871
						150	15.7539	13.0494	33.3694	20.4064	42.8046	28.1705	16.9708	29.4289	6.34512	18.6238	14.6699	19.399	20.1631	14.1811
						200	24.7024	17.2772	43.5216	25.6498	49.801	33.9962	26.8528	37.3726	12.3316	26.4072	20.4966	24.0501	29.1991	20.3234
						250	30.6697	22.4648	53.8564	29.9185	54.9409	39.0946	34.404	47.7534	16.7737	32.4478	25.56	28.3683	36.654	25.7164
						300	35.3829	25.6616	59.9745	34.7885	61.2167	44.3279	41.5922	53.9865	20.1434	36.902	29.4571	31.4573	43.1369	29.5229
						350	38.1659	28.8958	67.4136	37.0067	65.9953	48.3098	48.8519	61.1095	22.5186	40.6308	32.4884	33.7308	46.9779	33.5815
						400	41.641	32.2072	72.1069	39.2815	67.5127	50.7759	53.6238	66.57	24.9157	43.3983	35.1299	36.1174	51.1019	37.7319
							Cage control 5/6 (IC-mPFC)
						0	0	0	0	0	0	0	0	0	0	0	0	0	0
						50	0	0	0	0	0	0	0	6.79071	0	0	0	0	0
						100	0	4	4	8	12	2	11.2429	13.3755	10.5921	0	0	0	0
						150	15.9084	14.7886	12.0417	17.2066	18.8991	18.3134	16.5492	19.2926	22.3362	0	10.0735	3.09864	9.36332
						200	23.1162	18.9269	20.0507	21.2242	22.9611	27.8463	21.2795	24.4838	31.4311	8.80492	19.1898	14.4169	20.4993
						250	28.0466	22.0637	24.4118	23.4972	24.2679	16	23.2793	28.0158	35.2024	14.3632	26.556	22.2857	28.0763
						300	32.7914	24.3468	29.1505	26.3041	25.3872	12	25.073	31.6482	39.6214	18.6047	32.3761	28.4761	34.2968
						350	35.3024	25.9144	33.0808	23.6957	22.6319	10	27.35	33.4925	44.6905	22.559	38.7681	32.9608	39.4319
						400	38.0085	27.1975	35.8543	2	8	8	27.2832	35.0769	45.8408	25.4473	43.2349	35.9052	43.1433
