# Supplementary material for: Insula to mPFC reciprocal connectivity differentially underlies novel taste neophobic response and learning in mice
Source: eLife. 2021 Jul 5;10:e66686. doi: 10.7554/eLife.66686 (PMC8282338; doi:10.7554/eLife.66686)
Supplement: Figure 3—source data 1. [file elife-66686-fig3-data1.xlsx]

## Sheet: b. Total mPFC
Figure 3b
Novel Saccharin					Familiar saccharin
742	267	371			479	301	217
678	217	359			375	299
674	332	350			620	381	247
953	612	481				279	292
859	570	436			373
	621	368			227	263	235
970	409	457			299	266	345
1088	423	423			427	261

## Sheet: c.Layer 1-3
Figure 3c
Novel Saccharin					Familiar saccharin
333	83	90			132	90	63
247	70	105			99	89
329	81	119			160	108	62
449	166	155				77	82
339	171	127			129
	179	119			77	66	50
363	131	199			128	98	88
494	127	133			107	72

## Sheet: d. Layer 4-6
Figure 3d
Novel Saccharin					Familiar saccharin
409	184	281			347	211	154
431	147	254			276	210
345	251	231			460	273	185
504	446	326				202	210
520	399	309			244
	442	249			150	197	185
607	278	258			171	168	257
594	296	290			320	189

## Sheet: e. Cg1
Figure 3e
Novel Saccharin					Familiar saccharin
197	60	57			100	65	81
135	22	99			97	41
177	60	60			163	72	70
277	190	109				55	137
205	180	120			84
	179	48			46	51	103
274	144	76			84	47	135
441	106	123			135	75

## Sheet: f. Prelimbic
Figure 3f
Novel Saccharin					Familiar saccharin
401	146	221			278	174	136
352	154	209			185	179
348	232	239			415	260	177
552	343	316				178	155
397	326	277			252
	368	253			134	166	132
522	222	282			157	177	210
562	278	226			292	154

## Sheet: g. Infralimbic
Figure 3g
Novel Saccharin					Familiar saccharin
144	61	93			101	62	217
191	41	51			93	79
149	40	51			42	49	247
124	79	56				46	292
257	64	39			37
	74	67			47	46	235
174	43	99			58	42	345
85	39	74				32

## Sheet: j. mPFC projections
Figure 3j
Novel Saccharin					Familiar saccharin
12.1212	9.58409	6.85579			4.74576	3.74787	2.59259
13.9394	5.03247	7.88044			4.24629	4.90196
12.3037	6.46688	7.40741			9.07258	6.22084	5.55556
14.8148	13.0506	5.9375				4.86111	5.04202
11.8881	13.8699	8.46395			3.95778
	15.1329	6.83962			2.43243	4.5098	4.63321
16.8254	7.69231	7.2093			5.05319	3.76984	5.07246
16.5441	11.5813	8.05085			7.80669	4.05983

## Sheet: K. Layer 1-3
Figure 3K
Novel Saccharin					Familiar saccharin
13.2231	6.41509	6.06061			4.21456	2.07469	1.26582
10	4.15094	7.76699			2.7027	4.78723
14	5.70342	4.09357			12.2581	4.08163	10.2041
15.122	9.09091	3.24675				5.1948	1.16279
10.6509	12.3894	4.34783			2.40964
	13.5417	3.57143			2.85714	3.80952	3.48837
11.0465	7.54717	6.13497			6.25	2.95567	5.1948
18.1818	5.69106	3.33333			8.49057	1.52284

## Sheet: L. layer 4-6
Figure 3L
Novel Saccharin					Familiar saccharin
10.3896	12.5	7.2165			5.16717	4.91329	3.14136
19.2857	5.69801	7.92453			5.24475	4.95283
10.4396	7.00809	9.82906			7.62463	7.53769	4.32432
14.3836	15.2672	8.43374				4.63768	7.23684
13.6752	14.8045	10.1322			5.16432
	15.5216	8.98438			2.17391	5	5.20231
23.7762	7.76699	7.86517			4.16667	4.31894	5.02513
15.4321	13.8037	10.9589			7.36196	5.90406

## Sheet: m. Cg1
Figure 3m
Novel Saccharin					Familiar saccharin
9.02256	9.14634	5.40541			4.5	4.12844	1.75439
14.433	1.02041	7			6.33484	3.9548
11.7117	5.39216	3.2967			11.3537	6.57439	7.31707
12.8713	14.1026	7.84314				2.76498	5.55556
5.66038	13.4832	5.7971			3.73134
	12	0.884956			1.23457	2.68456	5.6
14.5631	11.6883	4.37956			7.0922	3.93258	3.37838
12.7451	14.5833	1.5625			9.92908	2.64317

[truncated: 2 more sheets: n. Prelimbic, O. Infralimbic]
