# Supplementary material for: Insula to mPFC reciprocal connectivity differentially underlies novel taste neophobic response and learning in mice
Source: eLife. 2021 Jul 5;10:e66686. doi: 10.7554/eLife.66686 (PMC8282338; doi:10.7554/eLife.66686)
Supplement: Figure 4—figure supplement 1—source data 1. [file elife-66686-fig4-figsupp1-data1.xlsx]

## Sheet: 1a
Source data for Figure 4- figure Supplement 1a
					CNO
				Day 1
				Day 2	62.5	94.4	93.75	87.5	94.1	86.6	93.3	93.7	84.6	86.6	92.8
				Day 3	23.5	50	55.5	53.3	88	88	66.6	31.25	5.26	50	0
				Day 4	26.3	31.6	60	64.7	54.5	84	36.8	18.75	0	82	81.25
				Day 5	42	36.3	73.7	45	11	68	44.4	15.8	5.8	40
					Saline
				Day 1
				Day 2	30	42.8	72.7	65	64.28	47.36	61.1	27	60	20
				Day 3	50	10.5	90	22	38	80	94	58.8	26	45
				Day 4	0	0	73	10	0	18	90	76	5	8
				Day 5	23.8	0	45	11	47.3	37.5	42.8	15	71	27
											Control virus with CNO
				Day 1	94	66	72	100	87.5	90	83
				Day 2	44	16	80	66	33	80
				Day 3	45.4	20	53.8	47	50	13.3	16.6
				Day 4	0	0	0	28.5	55.5	0	16.6
				Day 5	0	0	25	50	0	33	0

## Sheet: 1c- familiar
Source data for Figure 4- figure Supplement 1c
CNO	Saline
0	41.6
57.1	0
0	42.8
33	14
7.7	0
	38.4

## Sheet: 1e. CTA retrieval
Source data for Figure 4- figure Supplement 1e
CNO
92	93.75	81.8	100	85.7	7	100	100	100	100	100
Saline
87.5	100	93	50	92.8	100	96.5	94.7	100	100	88

## Sheet: 1g. Quinine
Source data for Figure 4- figure Supplement 1g
CNO
75	91.7	100	100	93	88	100
Saline
90	100	94	100	93	100	100
