# Supplementary material for: Insula to mPFC reciprocal connectivity differentially underlies novel taste neophobic response and learning in mice
Source: eLife. 2021 Jul 5;10:e66686. doi: 10.7554/eLife.66686 (PMC8282338; doi:10.7554/eLife.66686)
Supplement: Figure 4—source data 1. [file elife-66686-fig4-data1.xlsx]

## Sheet: d. Neophobia
Figure 4d
CNO
64.7	25	77.7	29.4	69.2	86.6	84.6	58	30	46.6	50
Saline
58.8	88	100	94	95	68.75	72.2	94	53	92

## Sheet: e. Attenuation of neophobia
Figure 4e
		CNO
	Day 2	62.5	94.4	93.75	87.5	94.1	86.6	93.3	93.7	84.6	86.6	92.8
	Day 3	23.5	50	55.5	53.3	88	88	66.6	31.25	5.26	50	0
	Day 4	26.3	31.6	60	64.7	54.5	84	36.8	18.75	0	82	81.25
	Day 5	42	36.3	73.7	45	11	68	44.4	15.8	5.8	40
		Saline
	Day 2	30	42.8	72.7	65	64.28	47.36	61.1	27	60	20
	Day 3	50	10.5	90	22	38	80	94	58.8	26	45
	Day 4	0	0	73	10	0	18	90	76	5	8
	Day 5	23.8	0	45	11	47.3	37.5	42.8	15	71	27
