# Supplementary material for: Insula to mPFC reciprocal connectivity differentially underlies novel taste neophobic response and learning in mice
Source: eLife. 2021 Jul 5;10:e66686. doi: 10.7554/eLife.66686 (PMC8282338; doi:10.7554/eLife.66686)
Supplement: Figure 5—source data 1. [file elife-66686-fig5-data1.xlsx]

## Sheet: 5d. Neophobia
Figure 5e
			CNO
			23	29	52.9	10.5	25	35	92	61.5
			Saline
			78.6	82	88	81	94	54

## Sheet: 5e. attenuation of neophobia_x0009_
Figure 5e
						Days	CNO
						2	11.8	23.5	40	11	11.8	25	94	73
						3	0	21	27	0	7	10	40	23.5
						4	71	0	25	0	0	15	71	27
						5	20	0	12.5	0	0
							Saline
						2	7	83	5	58	27	60
						3	6	12.5	6	0	59	26
						4	0	31	0	0	76	5
						5	0	0	0	0
