# Supplementary material for: Insula to mPFC reciprocal connectivity differentially underlies novel taste neophobic response and learning in mice
Source: eLife. 2021 Jul 5;10:e66686. doi: 10.7554/eLife.66686 (PMC8282338; doi:10.7554/eLife.66686)
Supplement: Figure 6—figure supplement 1—source data 1. [file elife-66686-fig6-figsupp1-data1.xlsx]

## Sheet: Sheet1
Supplementary Figure 5C
					CNO
					5	20	16.6	4.5
					Saline
					25	18.75	0	25	0
