# Supplementary material for: Insula to mPFC reciprocal connectivity differentially underlies novel taste neophobic response and learning in mice
Source: eLife. 2021 Jul 5;10:e66686. doi: 10.7554/eLife.66686 (PMC8282338; doi:10.7554/eLife.66686)
Supplement: Figure 6—figure supplement 2—source data 1. [file elife-66686-fig6-figsupp2-data1.xls]

## Sheet: 2b
Source data for Figure 6- figure Supplement 2b
				Cumulative duration					Frequency
				Controls	IC-to-mPFC	mPFC-to-IC			Controls	IC-to-mPFC	mPFC-to-IC
				110.56	159.6	113.36			48	43	50
				136.92	273	68.88			49	25	32
				93.52	115.64	56.84			54	58	27
				183.12	143.08	75			53	45	43
				138.88	40.04	172.2			49	28	45
				203	68.04	124.56			32	37	53
				157.92	54.6	54.88			27	29	32
				143.88	150.36	185.32			43	51	34
				199.36		87.32			45		39

## Sheet: 2e
Source data for Figure 6- figure Supplement 2e
		Saccharin 1				Water 1				Saccahrin 2				Water 2
		Controls	IC-to-mPFC	mPFC-to-IC		Controls	IC-to-mPFC	mPFC-to-IC		Controls	IC-to-mPFC	mPFC-to-IC		Controls	IC-to-mPFC	mPFC-to-IC
		10	10	10		1.4	20	5		0	6	4		4	0	0.5
		4	4.5	12		0	3	1		1	0	0		0	10	0
		7	2	3		0	2	0		1	1	2		0	0	4
		10	5	7		1	0	3		0	0	4		0	0	2
		5	1.5	9		10	3	2		1	0	0		0	2	6
		5	3.3	2		15	3	8		1	3	3		3	0	5
		10	6.4	6		10	7	0		10	1	4		0	4	8
		8	8	1		1	1	0		1	0	0		1	0	0
		20		0		8		3		1		0		1		0
