# Supplementary material for: Insula to mPFC reciprocal connectivity differentially underlies novel taste neophobic response and learning in mice
Source: eLife. 2021 Jul 5;10:e66686. doi: 10.7554/eLife.66686 (PMC8282338; doi:10.7554/eLife.66686)
Supplement: Figure 6—source data 1. [file elife-66686-fig6-data1.xls]

## Sheet: d. Neophobia
Figure 6d
Aversion index (%)
CNO
18.1	81.8	33.3	94.4	21.4	81.8	14.2	37.5
Saline
90	100	88.8	92.8	88.8

## Sheet: e. attenuation of neophobia
Figure 6e
Aversion index (%)
	CNO
2	37.5	93.3	13.3	95.4	5.2	86	20	81.8
3	38.8	68.4	13.3	95	4	16.6	6.25	37.5
4	10	33	12.5	16	0	13.3	0	50
5	0	35.7	41.6	5.5	20	16.6	0	71
	Saline
2	92.8	85	29.4	75	52
3	53.8	62.5	47.3	71.4	38.8
4	25	9	44.4	53.3	41
5	0	22	0	20	11.7
