# Supplementary figures and images for: Insula to mPFC reciprocal connectivity differentially underlies novel taste neophobic response and learning in mice
Source: eLife journal article supplement (doi:10.7554/elife.66686), 2021-07-05

#aIC-to-mPFC projections

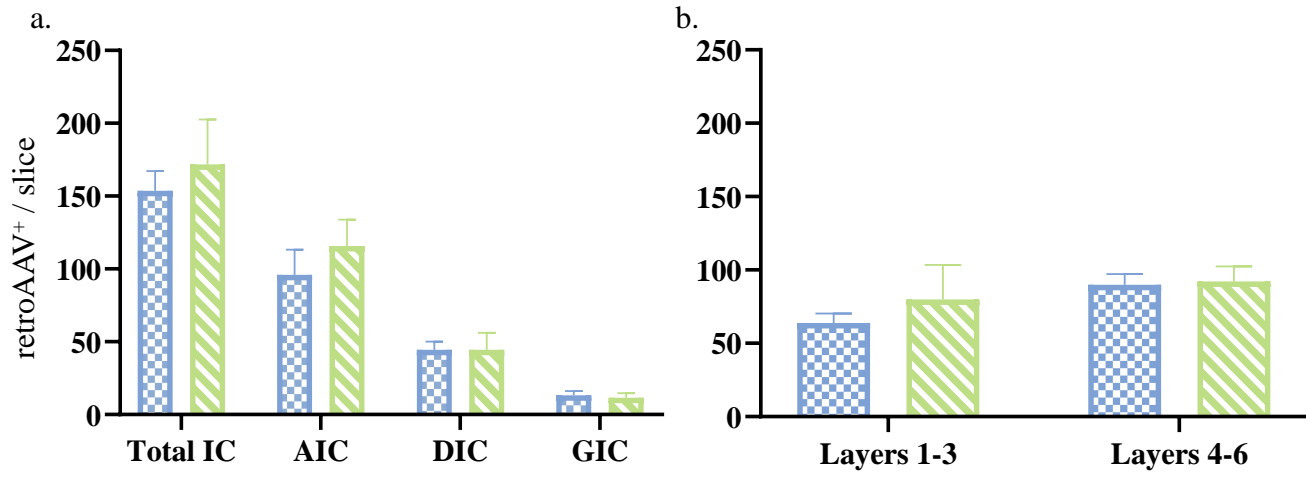

# mPFC-to-aIC projections

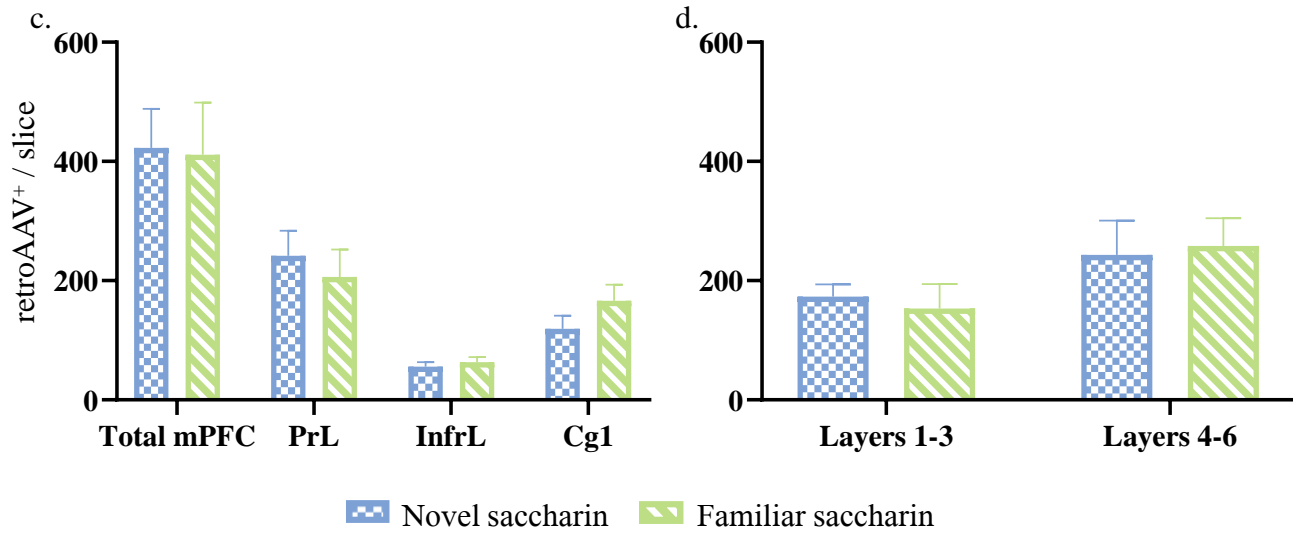

Supplement: supp [file elife_poa_e66686_Figure1_figure_supplement_1.pdf › elife_poa_e66686_Figure1_figure_supplement_1.pdf]

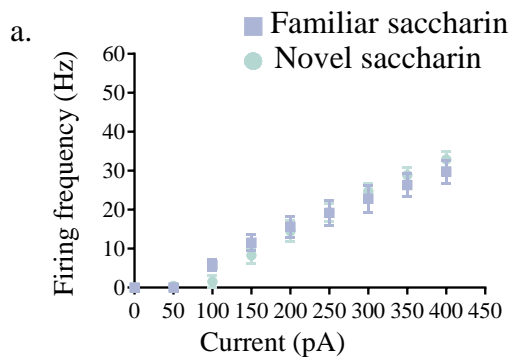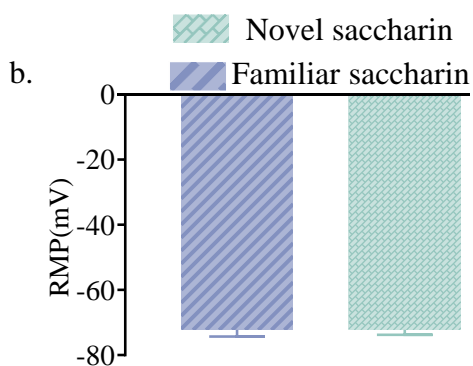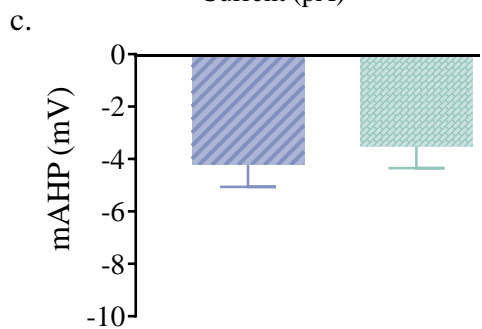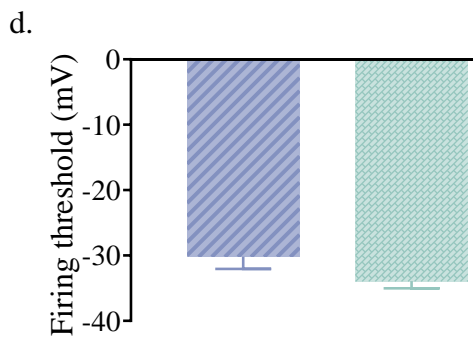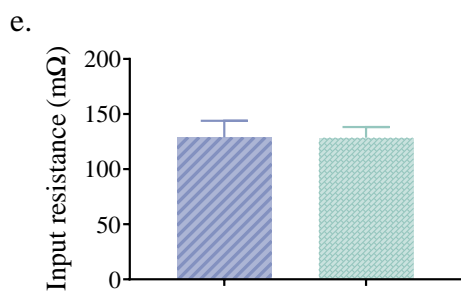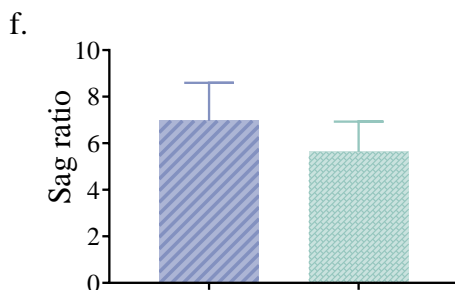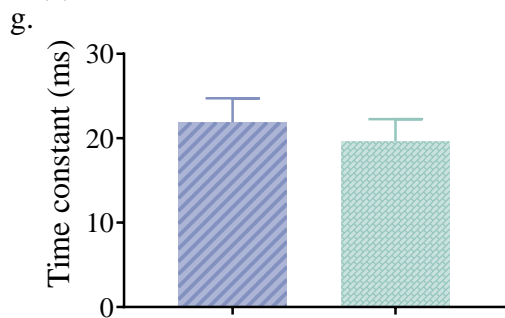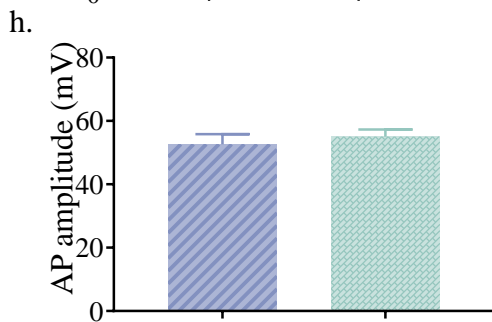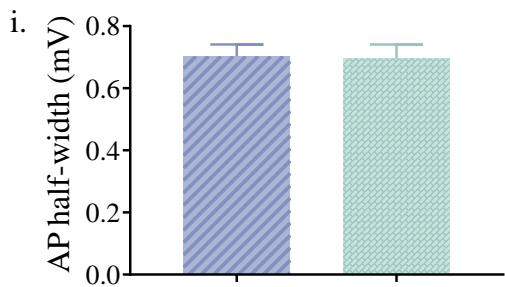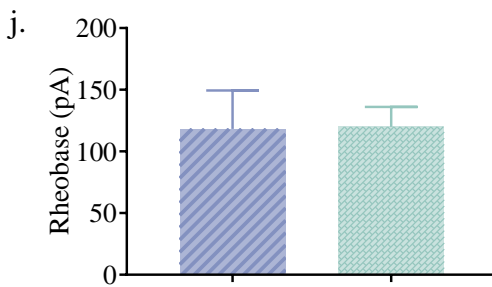

Supplement: supp [file elife_poa_e66686_Figure_2_figure_supplement_1.pdf › elife_poa_e66686_Figure_2_figure_supplement_1.pdf]

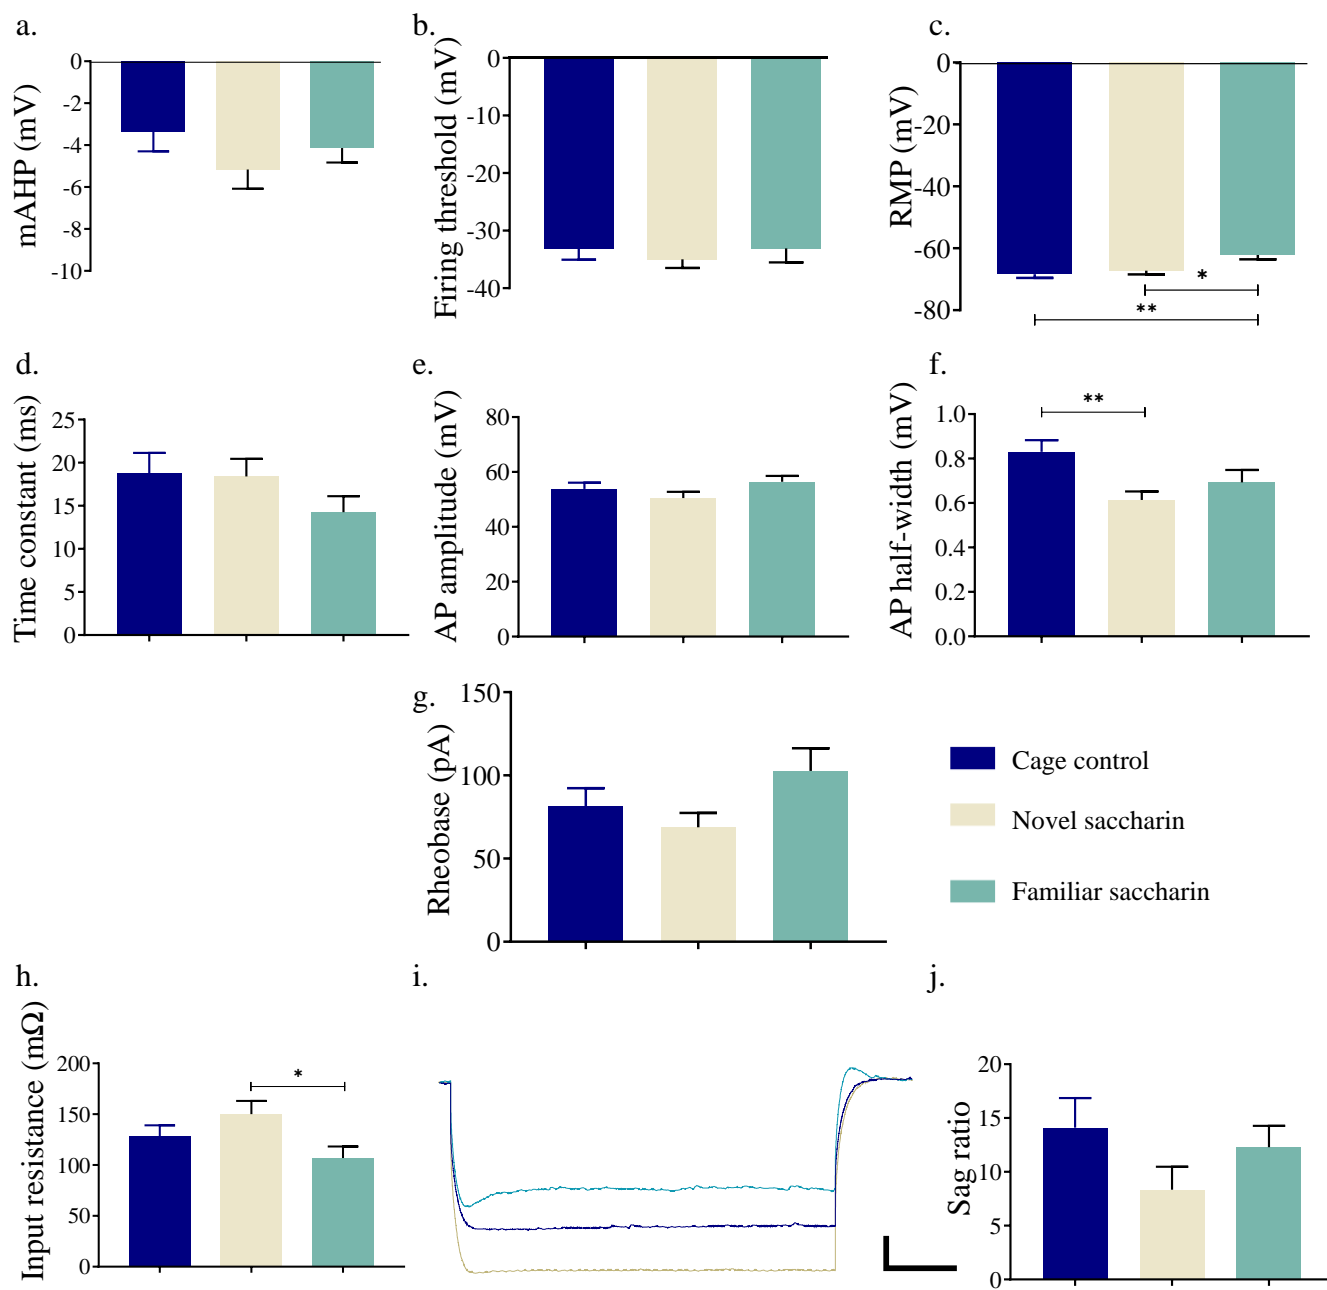

Supplement: supp [file elife_poa_e66686_Figure_2_figure_supplement_2.pdf › elife_poa_e66686_Figure_2_figure_supplement_2.pdf]

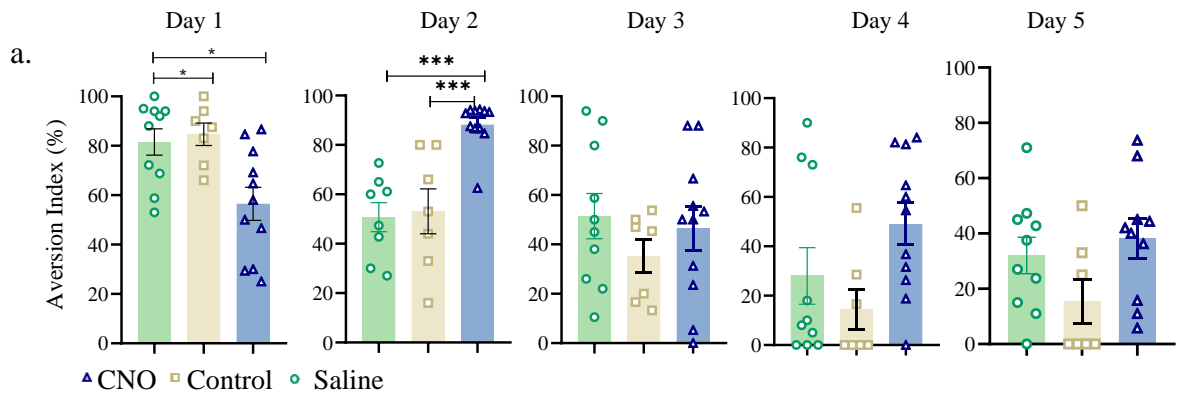

**b.**

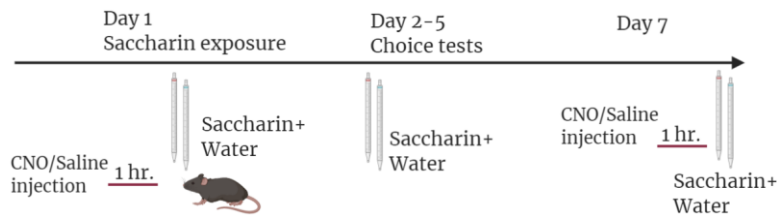

**c.**

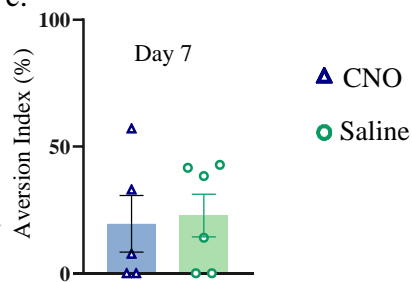

**d.**

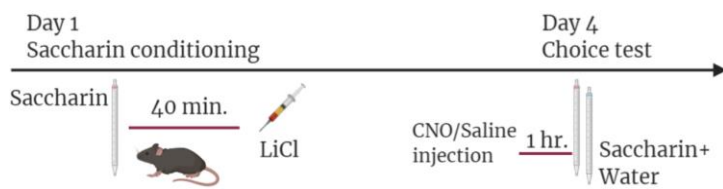

**e.**

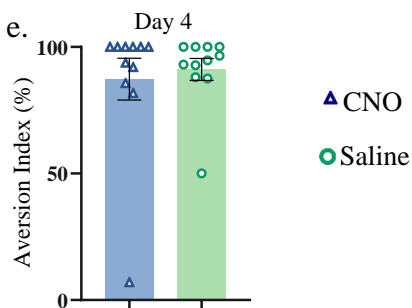

**f.**

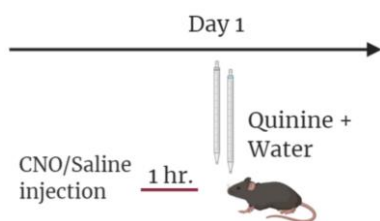

**g.**

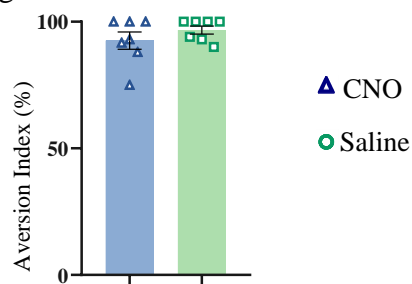

Supplement: supp [file elife_poa_e66686_Figure_4_figure_supplement_1.pdf › elife_poa_e66686_Figure_4_figure_supplement_1.pdf]

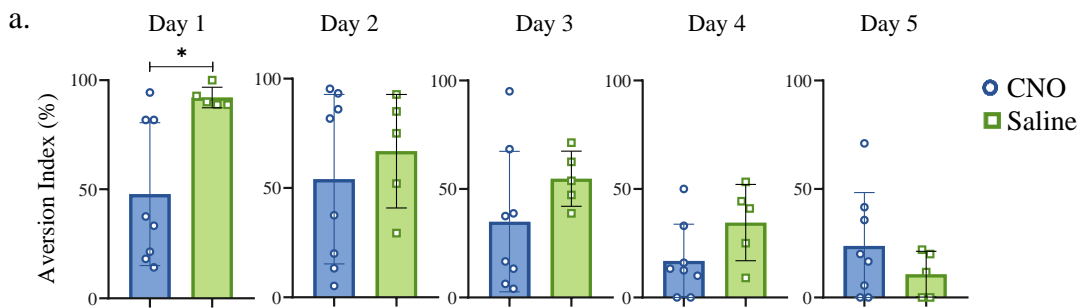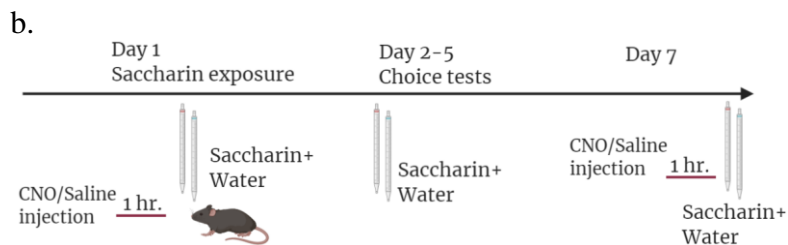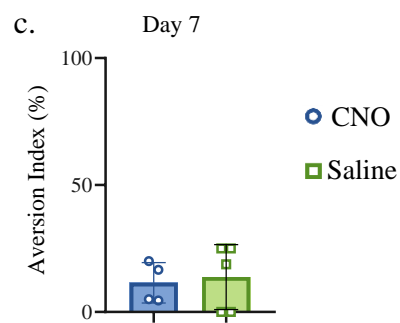

Supplement: supp [file elife_poa_e66686_Figure_6_figure_supplement1.pdf › elife_poa_e66686_Figure_6_figure_supplement1.pdf]

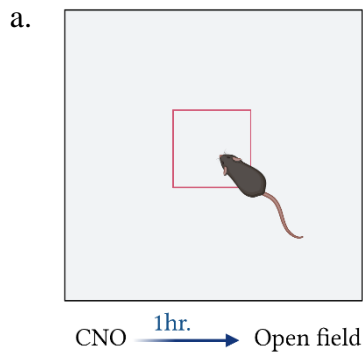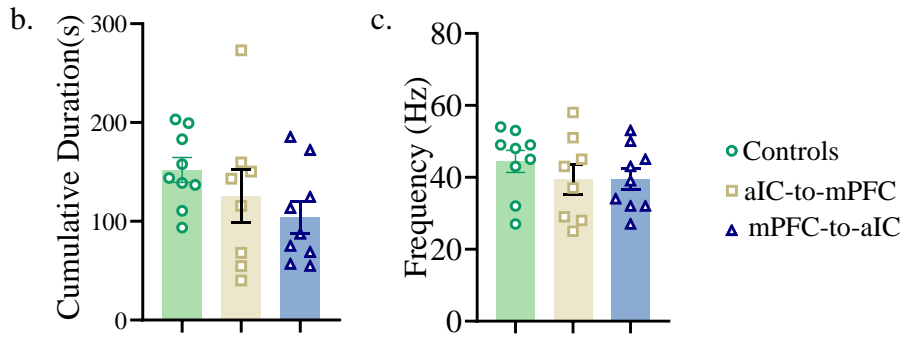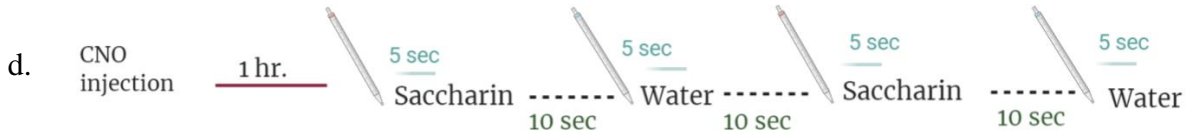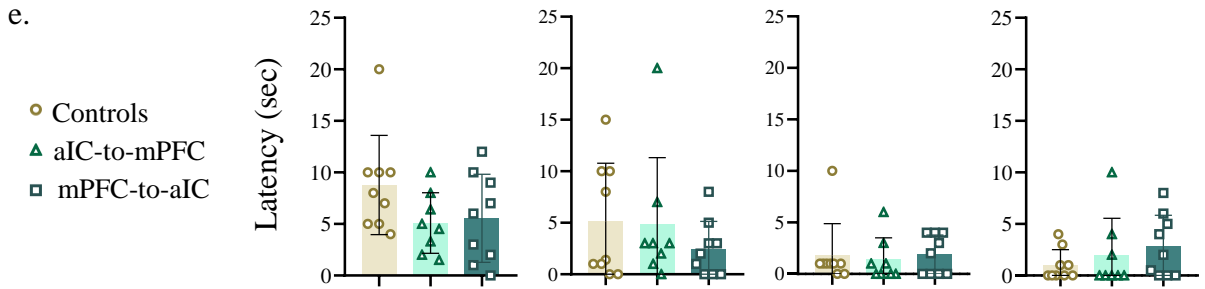

Supplement: supp [file elife_poa_e66686_Figure_6_figure_supplement_2.pdf › elife_poa_e66686_Figure_6_figure_supplement_2.pdf]
